# Supplementary material
Source: publisher figshare collection journal article supplement (https://acs.figshare.com/ndownloader/files/8765929)
Supplement: Supplementary file 1 [file 8765929]

# High-Pressure Synthesis and Local Structure of Corundum-Type $\text{In}_{2-2x}\text{Zn}_x\text{Sn}_x\text{O}_3$ ( $x \leq 0.7$ ) Supporting Information

*Cathleen A. Hoel<sup>†</sup>, José Manuel Gallardo Amores<sup>‡</sup>, Emilio Morán<sup>‡</sup>, Miguel Angel Álario-Franco<sup>‡</sup>, Jean-François Gaillard<sup>§</sup>, Kenneth R. Poeppelmeier<sup>†</sup>*

<sup>†</sup>Department of Chemistry, Northwestern University, 2145 Sheridan Road, Evanston, IL 60208,  
USA

<sup>‡</sup>Departamento de Química Inorgánica I, Universidad Complutense, 28040 Madrid, Spain

<sup>§</sup>Department of Civil and Environmental Engineering, Northwestern University, 2145 Sheridan  
Road, Evanston, IL 60208, USA

Email: [krp@northwestern.edu](mailto:krp@northwestern.edu)

X-ray diffraction (XRD) patterns of *cor*- $\text{In}_{0.8}\text{Zn}_{0.6}\text{Sn}_{0.6}\text{O}_3$  ( $x = 0.6$ ) were calculated based on the space groups  $R3c$  (average  $\text{LiNbO}_3$ -type arrangement, Table S1) and  $R-3c$  (average corundum-type arrangement, Table S2). The fractional coordinates of the In, Sn and Zn cations were the same for each Wyckoff position. The program PowderCell<sup>S1</sup> was used to calculate the diffraction pattern with a selected wavelength of 0.412 Å and a 0.002° step in 2θ. The peaks were computed using a pseudo-Voigt profile and a constant FWHM = 0.012° in 2θ to simulate the experimental high-resolution XRD data.

The calculated XRD pattern of *cor*-In<sub>0.8</sub>Zn<sub>0.6</sub>Sn<sub>0.6</sub>O<sub>3</sub> ( $x = 0.6$ ), based on the  $R3c$  space group, used the fractional coordinates that were determined for the LiNbO<sub>3</sub>-type ZnSnO<sub>3</sub> unit cell reported by Inaguma, *et al.* (reference 13 in the main text). Half of the In were substituted on the Zn site and half of the In were substituted on the Sn site.

|    | Wyckoff | $x/a$  | $y/b$ | $z/c$  | SOF | B (temp) |
|----|---------|--------|-------|--------|-----|----------|
| Zn | 6a      | 0      | 0     | 0.2859 | 0.6 | 0.5      |
| In | 6a      | 0      | 0     | 0.2859 | 0.4 | 0.5      |
| Sn | 6a      | 0      | 0     | 0.0000 | 0.6 | 0.5      |
| In | 6a      | 0      | 0     | 0.0000 | 0.4 | 0.5      |
| O  | 18b     | 0.0405 | 0.350 | 0.0709 | 1.0 | 0.5      |

**Table S1.** Unit cell used to calculate expected XRD pattern of LiNbO<sub>3</sub>-type *cor*-In<sub>0.8</sub>Zn<sub>0.6</sub>Sn<sub>0.6</sub>O<sub>3</sub> ( $x = 0.6$ ). Space group  $R3c$ ,  $a = 5.365$ ,  $c = 14.322$  Å.

The calculated XRD pattern of *cor*-In<sub>0.8</sub>Zn<sub>0.6</sub>Sn<sub>0.6</sub>O<sub>3</sub> ( $x = 0.6$ ), based on the  $R-3c$  space group, used the fractional coordinates that were determined for the corundum In<sub>2</sub>O<sub>3</sub> unit cell reported by Prewitt, *et al.* (reference 11 in the paper). Zn and Sn were substituted onto the In site. Although short-range ordering may be present, the average structure would appear corundum-like.

|    | Wyckoff | $x/a$ | $y/b$ | $z/c$  | SOF | B (temp) |
|----|---------|-------|-------|--------|-----|----------|
| In | 12c     | 0     | 0     | 0.3573 | 0.4 | 0.5      |
| Zn | 12c     | 0     | 0     | 0.3573 | 0.3 | 0.5      |
| Sn | 12c     | 0     | 0     | 0.3573 | 0.3 | 0.5      |
| O  | 18e     | 0.298 | 0     | 0.25   | 1.0 | 0.5      |

**Table S2.** Unit cell used to calculated expected XRD pattern of corundum-type *cor*-In<sub>0.8</sub>Zn<sub>0.6</sub>Sn<sub>0.6</sub>O<sub>3</sub> ( $x = 0.6$ ). Space group  $R-3c$ ,  $a = 5.365$ ,  $c = 14.322$  Å.

The simulated diffraction patterns show a small difference in relative intensities, which are listed in Table S3 for the first ten reflections. The relative intensities of the experimental high-resolution XRD data ( $x = 0.6$ ) are also listed in Table S3 for comparison. The calculated

and experimental diffraction patterns are plotted in Figure S1 and it is apparent that the expected diffraction patterns of  $cor\text{-In}_{0.8}\text{Zn}_{0.6}\text{Sn}_{0.6}\text{O}_3$  ( $x = 0.6$ ) based on the space groups  $R3c$  and  $R\bar{3}c$  are very similar to each other. The relative intensities of the first three peaks suggests  $\text{LiNbO}_3$ -type ordering is present. The origin of the differences of the experimental and calculated relative peak intensities for the (113) and (116) reflections remains unknown.

| hkl | d (Å)  | $I_{rel}(R3c)$ | $I_{rel}(R\bar{3}c)$ | $I_{rel}(x = 0.6)$ |
|-----|--------|----------------|----------------------|--------------------|
| 012 | 3.8977 | 24.78          | 19.13                | 23                 |
| 104 | 2.8361 | 100.00         | 100.00               | 100                |
| 110 | 2.6825 | 88.84          | 89.58                | 89                 |
| 006 | 2.3870 | 4.70           | 4.09                 | 5                  |
| 113 | 2.3386 | 5.86           | 5.92                 | 8                  |
| 202 | 2.2097 | 2.84           | 1.98                 | 3                  |
| 024 | 1.9489 | 42.69          | 42.52                | 45                 |
| 116 | 1.7832 | 38.52          | 37.21                | 53                 |
| 211 | 1.7431 | 0.27           | 0.32                 | 0                  |

**Table S3.** Relative intensities of the calculated diffraction peaks for  $cor\text{-In}_{0.8}\text{Zn}_{0.6}\text{Sn}_{0.6}\text{O}_3$  ( $x = 0.6$ ) based on the  $R3c$  and  $R\bar{3}c$  space groups and the high-resolution XRD data.

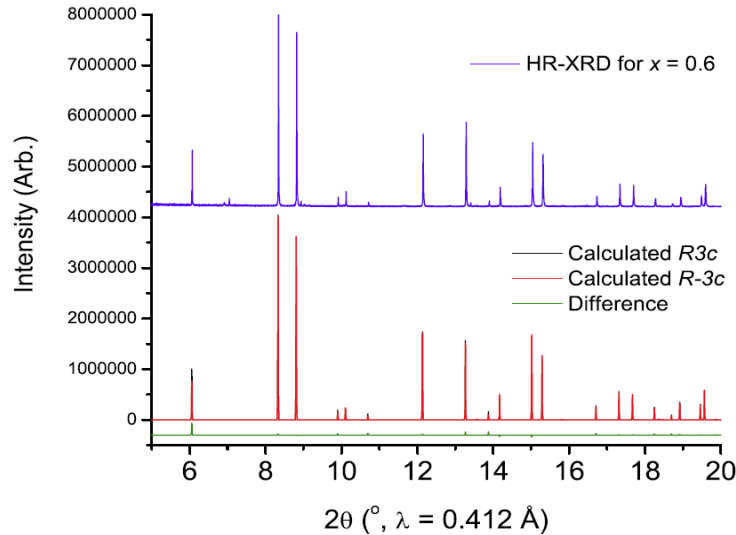

**Figure S1.** The experimental high-resolution XRD pattern of  $cor\text{-In}_{0.8}\text{Zn}_{0.6}\text{Sn}_{0.6}\text{O}_3$  ( $x = 0.6$ , top blue line) and the calculated XRD patterns of  $cor\text{-In}_{0.8}\text{Zn}_{0.6}\text{Sn}_{0.6}\text{O}_3$  based on the  $R3c$  space group (black line) and the  $R\bar{3}c$  space group (red line). The difference pattern of the calculated XRD patterns based on the space groups  $R3c$  and  $R\bar{3}c$  is plotted on the bottom (green line). The peaks observed in the experimental pattern (top) at  $2\theta \sim 7^\circ$  are due to trace amounts of  $\text{SnO}_2$  and an unknown phase.

## References

S1. Kraus, W. and Nolze, G., *J. Appl. Cryst.* **1996**, 29, 301-303.
